# Supplementary material
Source: Springer Nature journal article supplement (https://www.springermedizin.de/resource/supplementary/13063_2012_1050_MOESM1_ESM.pdf/9619614)
Supplement: MOESM1 [file 9619614]

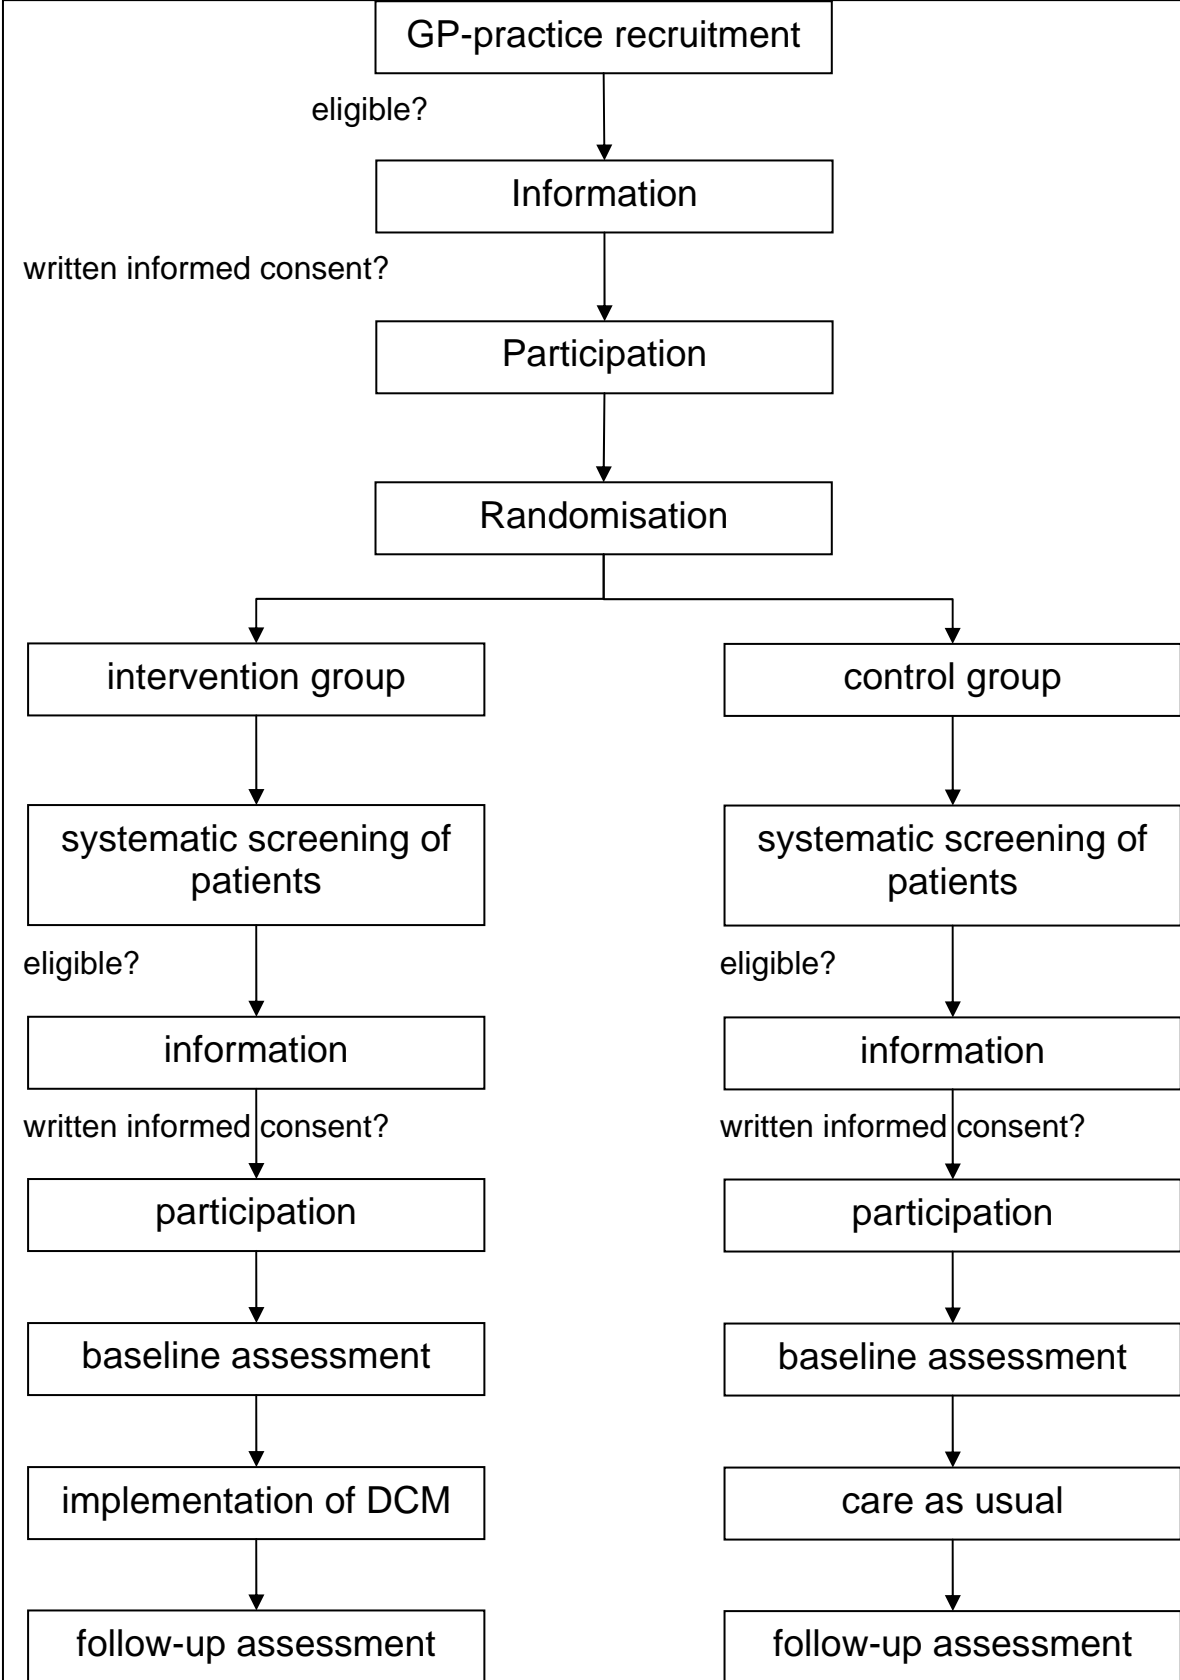

GP-practice recruitment

eligible?

Information

written informed consent?

Participation

Randomisation

intervention group

control group

systematic screening of patients

systematic screening of patients

eligible?

information

eligible?

information

written informed consent?

participation

written informed consent?

participation

baseline assessment

baseline assessment

implementation of DCM

care as usual

follow-up assessment

follow-up assessment
